# Supplementary material
Source: HighWire-hosted journal article supplement (https://mentalhealth.bmj.com/content/24/1/33)
Supplement: inline-supplementary-material-1 [file inline-supplementary-material-1.pdf]

## Additional file 1. Systematic Review Search Terms

### Pubmed (MeSH)

((behavior therapy[MeSH Major Topic] AND mental disorder[MeSH Major Topic]) AND (modif\*[Title/Abstract] OR adapt\*[Title/Abstract] OR alter\*[Title/Abstract]))

### PsycInfo (Thesaurus)

(DE "Mental Disorders" OR DE "Adjustment Disorders" OR DE "Affective Disorders" OR DE "Alexithymia" OR DE "Anxiety Disorders" OR DE "Autism Spectrum Disorders" OR DE "Chronic Mental Illness" OR DE "Dementia" OR DE "Dissociative Disorders" OR DE "Eating Disorders" OR DE "Elective Mutism" OR DE "Factitious Disorders" OR DE "Gender Identity Disorder" OR DE "Hoarding Disorder" OR DE "Hysteria" OR DE "Impulse Control Disorders" OR DE "Koro" OR DE "Mental Disorders due to General Medical Conditions" OR DE "Neurosis" OR DE "Paraphilias" OR DE "Personality Disorders" OR DE "Pseudodementia" OR DE "Psychosis" OR DE "Schizoaffective Disorder") AND (DE "Cognitive Behavior Therapy" OR DE "Acceptance and Commitment Therapy") AND (modif\* OR adapt\* OR alter\*)

### EMBASE (Emtree)

'mental disease'/exp/mj AND ('behavior therapy'/exp/mj OR 'cognitive behavioral therapy'/exp/mj OR 'cognitive therapy'/exp/mj) AND ('modif\*':ab,ti OR 'adapt\*':ab,ti OR 'alter\*':ab,ti)

### Web of Science

TOPIC: (behavio\* therapy OR cognitive behavio\* therapy OR cognitive therapy) AND TOPIC: (modif\* OR adapt\* OR alter\*) AND TOPIC: (Anxiety Disorders OR Agoraphobia OR Separation Anxiety OR Neurocirculatory Asthenia OR Neurotic Disorders OR Obsessive-Compulsive Disorder OR Panic Disorder OR Phobic Disorders OR Bipolar and Related Disorders OR Bipolar Disorder OR Disruptive, Impulse Control, and Conduct Disorders OR Firesetting Behavior OR Gambling OR Trichotillomania OR Dissociative Disorders OR Multiple Personality Disorder OR Elimination Disorders OR Encopresis OR Enuresis OR Feeding and Eating Disorders OR Anorexia Nervosa OR Binge-Eating Disorder OR Bulimia Nervosa OR Feeding and Eating Disorders of Childhood OR Female Athlete Triad Syndrome OR Food Addiction OR Night Eating Syndrome OR Pica OR Mood Disorders OR Cyclothymic Disorder OR Depressive Disorder OR Motor Disorders OR Neurocognitive Disorders OR Amnesia OR Cognition Disorders OR Consciousness Disorders OR Delirium OR Dementia OR Dyslexia, Acquired OR Neurodevelopmental Disorders OR Attention Deficit and Disruptive Behavior Disorders OR Child Behavior Disorders OR Child Development Disorders, Pervasive OR Communication Disorders OR Developmental Disabilities OR Intellectual Disability OR Learning Disorders OR Motor Skills Disorders OR Mutism OR Reactive Attachment Disorder OR Schizophrenia, Childhood OR Stereotypic Movement Disorder OR Tic Disorders OR Neurotic Disorders OR Paraphilic Disorders OR Exhibitionism OR Fetishism (Psychiatric) OR Masochism OR Pedophilia OR Sadism OR Transvestism OR Voyeurism OR Personality Disorders OR Antisocial Personality Disorder OR Borderline Personality Disorder OR Compulsive Personality Disorder OR Dependent Personality Disorder OR Histrionic Personality Disorder OR Paranoid Personality Disorder OR Passive-Aggressive Personality Disorder OR

Schizoid Personality Disorder OR Schizotypal Personality Disorder OR Schizophrenia Spectrum and Other Psychotic Disorders OR Affective Disorders, Psychotic OR Capgras Syndrome OR Delusional Parasitosis OR Morgellons Disease OR Paranoid Disorders OR Psychotic Disorders OR Schizophrenia OR Sexual Dysfunctions, Psychological OR Dyspareunia OR Erectile Dysfunction OR Gender Dysphoria OR Premature Ejaculation OR Sexual and Gender Disorders OR Vaginismus OR Sleep Wake Disorders OR Dyssomnias OR Parasomnias OR Somatoform Disorders OR Body Dysmorphic Disorders OR Conversion Disorder OR Factitious Disorders OR Hypochondriasis OR Neurasthenia OR Substance-Related Disorders OR Alcohol-Related Disorders OR Amphetamine-Related Disorders OR Cocaine-Related Disorders OR Inhalant Abuse OR Marijuana Abuse OR Marijuana Use OR Neonatal Abstinence Syndrome OR Opioid-Related Disorders OR Phencyclidine Abuse OR Psychoses, Substance-Induced OR Substance Abuse, Intravenous OR Substance Abuse, Oral OR Substance Withdrawal Syndrome OR Tobacco Use Disorder OR Trauma and Stressor Related Disorders OR Adjustment Disorders OR Stress Disorders, Traumatic)
