# Supplementary material
Source: HighWire-hosted journal article supplement (https://mentalhealth.bmj.com/content/24/1/33)
Supplement: inline-supplementary-material-2 [file inline-supplementary-material-2.pdf]

**Additional File 2. Basic characteristics of included reports and type and number of methods used to conduct the adaptation**

| <b>Citation</b>                                                                                                                                                                                                                                                                                | <b>Evidence-based psychosocial treatment</b> | <b>Mental illness</b> | <b>Method/s Used for Treatment Adaptation</b>   | <b>Total number of methods used</b> |
|------------------------------------------------------------------------------------------------------------------------------------------------------------------------------------------------------------------------------------------------------------------------------------------------|----------------------------------------------|-----------------------|-------------------------------------------------|-------------------------------------|
| <b>Planned Adaptations</b>                                                                                                                                                                                                                                                                     |                                              |                       |                                                 |                                     |
| Alegría, M., Ludman, E., Kafali, N., Lapatin, S., Vila, D., Shrout, P.E., ..., Canino, G. (2014). Effectiveness of the engagement and counseling of latinos (ECLA) Intervention in Low-Income Latinos. <i>Medical Care</i> , 52(11), 989-997.                                                  | CBT                                          | Depression            | Data<br>Stakeholder interview                   | 2                                   |
| Alford, B.A. & Beck, A.T. (1994). Cognitive therapy of delusional beliefs. <i>Behaviour Research and Therapy</i> , 32(3), 369-380.                                                                                                                                                             | Cognitive therapy                            | Delusional disorder   | Literature review<br>Theory                     | 2                                   |
| Ammerman, R. T., Putnam, F. W., Stevens, J., Bosse, N. R., Short, J. A., Bodley, A. L., & Van Ginkel, J. B. (2011). An open trial of in-home CBT for depressed mothers in home visitation. <i>Maternal and Child Health Journal</i> , 15(8), 1333-1341.                                        | CBT                                          | Major depression      | Literature review<br>Stakeholder interview      | 2                                   |
| Arch, J. J., & Ayers, C. R. (2013). Which treatment worked better for whom? Moderators of group cognitive behavioral therapy versus adapted mindfulness based stress reduction for anxiety disorders. <i>Behaviour Research and Therapy</i> , 51(8), 434-442.                                  | MBSR<br>Group CBT                            | Anxiety disorder      | Literature review<br>Theory                     | 2                                   |
| Archer, M., Brown, J. S., Idusohan, H., Coventry, S., Manoharan, A., & Espie, C. A. (2009). The development and evaluation of a large-scale self-referral CBT-I intervention for men who have insomnia: An exploratory study. <i>Behavioural and cognitive psychotherapy</i> , 37(3), 239-248. | CBT-I                                        | Insomnia              | Clinical intuition<br>Data<br>Literature review | 3                                   |
| Aslam, M., Irfan, M., & Naeem, F. (2015). Brief                                                                                                                                                                                                                                                |                                              |                       |                                                 |                                     |

|                                                                                                                                                                                                                                                                                                        |                              |                                                                 |                                         |   |
|--------------------------------------------------------------------------------------------------------------------------------------------------------------------------------------------------------------------------------------------------------------------------------------------------------|------------------------------|-----------------------------------------------------------------|-----------------------------------------|---|
| culturally adapted cognitive behaviour therapy for obsessive compulsive disorder: a pilot study. Pakistan journal of medical sciences, 31(4), 874.                                                                                                                                                     | CBT                          | OCD                                                             | Clinical intuition<br>Data<br>Theory    | 3 |
| Bamford, B. H., & Mountford, V. A. (2012). Cognitive behavioural therapy for individuals with longstanding anorexia nervosa: Adaptations, clinician survival and system issues. European Eating Disorders Review, 20(1), 49-59.                                                                        | CBT                          | Anorexia nervosa                                                | Clinical Intuition<br>Theory            | 2 |
| Bass, J. K., Annan, J., McIvor Murray, S., Kaysen, D., Griffiths, S., Cetinoglu, T., ... & Bolton, P. A. (2013). Controlled trial of psychotherapy for Congolese survivors of sexual violence. New England Journal of Medicine, 368(23), 2182-2191.                                                    | Cognitive Processing Therapy | PTSD symptoms and combined depression and anxiety symptoms      | Theory                                  | 1 |
| Bastiampillai, T., Jones, G.M., Furber, G., Moreau, M., Healey, D., Watson, J., & Battersby, M. (2014). The IAPT@Flinders service: adapting the improving access to psychological therapies model to the emergency department setting in Australia. Australasian Psychiatry, 22(3), 277-280.           | CBT                          | Adjustment disorders, anxiety and/or depressive symptoms        | Data                                    | 1 |
| Beck, J.G. & Coffey, S.F. (2005). Group cognitive behavioral treatment for PTSD: Treatment of motor vehicle accident survivors. Cognitive and Behavioral Practice, 12(3), 267-277.                                                                                                                     | CBT                          | PTSD in the aftermath of a serious motor vehicle accident (MVA) | Clinical intuition<br>Literature review | 2 |
| Ben-Porath, D. D., Peterson, G. A., & Smee, J. (2004). Treatment of individuals with borderline personality disorder using dialectical behavior therapy in a community mental health setting: Clinical application and a preliminary investigation. Cognitive and Behavioral Practice, 11(4), 424-434. | DBT                          | Borderline personality disorder                                 | Literature review                       | 1 |
| Benítez, C. I. P., Zlotnick, C., Gomez, J., Rendón,                                                                                                                                                                                                                                                    |                              |                                                                 |                                         |   |

|                                                                                                                                                                                                                                                                            |                                                                                 |                                                                                    |                                         |   |
|----------------------------------------------------------------------------------------------------------------------------------------------------------------------------------------------------------------------------------------------------------------------------|---------------------------------------------------------------------------------|------------------------------------------------------------------------------------|-----------------------------------------|---|
| M. J., & Swanson, A. (2013). Cognitive behavioral therapy for PTSD and somatization: An open trial. <i>Behaviour research and therapy</i> , 51(6), 284-289.                                                                                                                | CBT                                                                             | PTSD and somatization                                                              | Clinical intuition                      | 1 |
| Birling, Y., Wang, J., Li, G., Wu, E., Yu, Z., Feng, Y., & Wu, Y. (2018). Culturally Adapted CBTI for Chinese Insomnia Patients: a One-Arm Pilot Trial. <i>International journal of behavioral medicine</i> , 25(3), 331-340.                                              | CBT                                                                             | Insomnia                                                                           | Clinical intuition                      | 1 |
| Blackford, J. U., & Love, R. (2011). Dialectical behavior therapy group skills training in a community mental health setting: A pilot study. <i>International journal of group psychotherapy</i> , 61(4), 645-657.                                                         | DBT                                                                             | Any DSM-IVR Axis I diagnosis and/or a diagnosis of Borderline Personality Disorder | Clinical intuition<br>Literature review | 2 |
| Borge, F. M., Hoffart, A., Sexton, H., Clark, D. M., Markowitz, J. C., & McManus, F. (2008). Residential cognitive therapy versus residential interpersonal therapy for social phobia: A randomized clinical trial. <i>Journal of Anxiety Disorders</i> , 22(6), 991-1010. | Residential cognitive therapy (RCT)<br>Residential interpersonal therapy (RIPT) | Social phobia                                                                      | Clinical intuition<br>Theory            | 2 |
| Botella, C., García-Palacios, A., Guillen, V., Banos, R. M., Quero, S., & Alcaniz, M. (2010). An adaptive display for the treatment of diverse trauma PTSD victims. <i>Cyberpsychology, Behavior, and Social Networking</i> , 13(1), 67-71.                                | CBT                                                                             | PTSD                                                                               | Literature review                       | 1 |
| Bowen, S., Somohano, V. C., Rutkie, R. E., Manuel, J. A., & Rehder, K. L. (2017). Mindfulness-based relapse prevention for methadone maintenance: a feasibility trial. <i>The Journal of Alternative and Complementary Medicine</i> , 23(7), 541-544.                      | Mindfulness-based relapse prevention (MBRP)                                     | Substance Use Disorder                                                             | Stakeholder interview                   | 1 |
| Bradley, G. M., Couchman D Psych, G. M.,                                                                                                                                                                                                                                   |                                                                                 |                                                                                    |                                         |   |

|                                                                                                                                                                                                                                                                                                                                                          |                                              |                                                                             |                                                   |   |
|----------------------------------------------------------------------------------------------------------------------------------------------------------------------------------------------------------------------------------------------------------------------------------------------------------------------------------------------------------|----------------------------------------------|-----------------------------------------------------------------------------|---------------------------------------------------|---|
| Perlesz, A., Nguyen, A. T., Singh, B., & Riess, C. (2006). Multiple-family group treatment for English-and Vietnamese-speaking families living with schizophrenia. <i>Psychiatric Services</i> , 57(4), 521-530.                                                                                                                                         | Multiple-family group CBT intervention       | Schizophrenia                                                               | Stakeholder Theory                                | 2 |
| Bradshaw, W. (1998). Cognitive-behavioral treatment of schizophrenia: A case study. <i>Journal of Cognitive Psychotherapy</i> , 12, 13-26.                                                                                                                                                                                                               | CBT                                          | Schizophrenia                                                               | Literature review                                 | 1 |
| Brandon, A. R., & Freeman, M. P. (2011). When she says “no” to medication: psychotherapy for antepartum depression. <i>Current psychiatry reports</i> , 13(6), 459-466.                                                                                                                                                                                  | CBT                                          | Major depressive disorder<br>Antepartum depression                          | Literature review                                 | 1 |
| Brooks, A. C., Chambers, J. E., Lauby, J., Byrne, E., Carpenedo, C. M., Benishek, L. A., ... & Kirby, K. C. (2016). Implementation of a brief treatment counseling toolkit in federally qualified healthcare centers: Patient and clinician utilization and satisfaction. <i>Journal of substance abuse treatment</i> , 60, 70-80.                       | CBT                                          | Substance use                                                               | Clinical intuition                                | 1 |
| Bryant, R. A., & Njenga, F. G. (2006). Cultural sensitivity: making trauma assessment and treatment plans culturally relevant. <i>The Journal of clinical psychiatry</i> , 67, 74-79.                                                                                                                                                                    | Narrative exposure therapy (CBT)             | PTSD and related comorbid conditions such as depression, anxiety, and grief | Clinical intuition<br>Literature review<br>Theory | 3 |
| Bufka, L. F., & Hofmann, S. G. (1999). Modifying CBT to treat panic disorder in patients with schizophrenia. <i>Cognitive and behavioral practice</i> , 6(1), 10-15.                                                                                                                                                                                     | Panic Control Treatment (PCT): a form of CBT | Comorbid schizophrenia and panic disorder:                                  | Clinical intuition<br>Literature review           | 2 |
| Butler, L., Johns, L., Byrne, M., Joseph, C., O'Donoghue, E., Jolley, S., ... Morris, E. (2016). Running acceptance and commitment therapy groups for psychosis in community settings. <i>Journal of Contextual Behavioral Science</i> , 5(1), 33-8. <a href="https://doi.org/10.1016/j.jcbs.2015.12.001">https://doi.org/10.1016/j.jcbs.2015.12.001</a> | ACT                                          | Psychosis                                                                   | Clinical intuition                                | 1 |

|                                                                                                                                                                                                                                                                                                     |                                                |                                                                                 |                               |   |
|-----------------------------------------------------------------------------------------------------------------------------------------------------------------------------------------------------------------------------------------------------------------------------------------------------|------------------------------------------------|---------------------------------------------------------------------------------|-------------------------------|---|
| Cachelin, F. M., Shea, M., & Bono, F. A. (2015). Cognitive-Behavioral Therapy Guided Self-Help for Binge Eating: A Culturally Sensitive Minimal or Early Intervention Program. <i>Eating Disorders and Obesity: A Counselor's Guide to Prevention and Treatment</i> , 265-283.                      | CBT guided self-help program                   | Eating disorders such as bulimia nervosa and binge eating disorder              | Data<br>Stakeholder interview | 2 |
| Cachelin, F. M., Shea, M., Phimphasone, P., Wilson, G. T., Thompson, D. R., & Striegel, R. H. (2014). Culturally adapted cognitive behavioral guided self-help for binge eating: A feasibility study with Mexican Americans. <i>Cultural Diversity and Ethnic Minority Psychology</i> , 20(3), 449. | CBT-based self-help program                    | Binge eating disorder<br>Recurrent binge eating<br>Bulimia nervosa              | Data<br>Theory                | 2 |
| Calamari, J.E., Pontarelli, N.K., Armstrong, K.M., & Salstrom, S.A. (2012). Obsessive-compulsive disorder in late life. <i>Cognitive and Behavioral Practice</i> , 19, 136-150.                                                                                                                     | CBT                                            | OCD                                                                             | Literature review             | 1 |
| Callcott, Pauline & Dudley, Rob & Standart, Sally & Freeston, Mark & Turkington, Douglas. (2013). Treating trauma in people with first-episode psychosis using cognitive behavioural therapy: A Symptom-based Approach.                                                                             | Trauma oriented CBT for psychosis              | First-episode psychosis                                                         | Literature review<br>Theory   | 2 |
| Calleo, J. S., Bush, A. L., Cully, J. A., Wilson, N. L., Kraus-Schuman, C., Rhoades, H. M., ... & Kunik, M. E. (2013). Treating late-life GAD in primary care: An effectiveness pilot study. <i>The Journal of nervous and mental disease</i> , 201(5), 414.                                        | CBT                                            | Generalized anxiety disorder (GAD)                                              | Literature review<br>Theory   | 2 |
| Cannity, K. M., & Hopko, D. R. (2017). Behavioral Activation for a Breast Cancer Patient with Major Depression and Coexistent Personality Disorder. <i>Journal of Contemporary Psychotherapy</i> , 47(4), 201-210.                                                                                  | Behavioral Activation Treatment for Depression | Recurrent major depression and obsessive-compulsive personality disorder (OCPD) | Clinical intuition            | 1 |
| Carey, K. B., Leontieva, L., Dimmock, J., Maisto,                                                                                                                                                                                                                                                   |                                                |                                                                                 |                               |   |

|                                                                                                                                                                                                                                                                                                                |                                                                                                      |                                                  |                                                      |   |
|----------------------------------------------------------------------------------------------------------------------------------------------------------------------------------------------------------------------------------------------------------------------------------------------------------------|------------------------------------------------------------------------------------------------------|--------------------------------------------------|------------------------------------------------------|---|
| S. A., & Batki, S. L. (2007). Adapting motivational interventions for comorbid schizophrenia and alcohol use disorders. <i>Clinical Psychology: Science and Practice</i> , 14(1), 39-57.                                                                                                                       | Motivational enhancement protocol                                                                    | Comorbid schizophrenia and alcohol use disorders | Theory                                               | 1 |
| Carmin, C. N., Pollard, C. A., & Ownby, R. L. (1999). Cognitive behavioral treatment of older adults with obsessive-compulsive disorder. <i>Cognitive and Behavioral Practice</i> , 6(2), 110-119.                                                                                                             | CBT                                                                                                  | OCD                                              | Clinical intuition<br>Literature review              | 2 |
| Carrico, A. W., Nil, E., Sophal, C., Stein, E., Sokunny, M., Yuthea, N., ... & Page, K. (2016). Behavioral interventions for Cambodian female entertainment and sex workers who use amphetamine-type stimulants. <i>Journal of Behavioral Medicine</i> , 39(3), 502-510.                                       | Twelve week condition cash transfer intervention<br>Four week cognitive behavioral aftercare program | Stimulant use disorders                          | Literature review<br>Stakeholder interview<br>Theory | 3 |
| Castillo, Diane. (2004). Systematic outpatient treatment of sexual trauma in women: Application of cognitive and behavioral protocols. <i>Cognitive and Behavioral Practice</i> . 11. 352-365.                                                                                                                 | CBT                                                                                                  | PTSD                                             | Literature review<br>Theory                          | 2 |
| Chadwick, P. (2014). Mindfulness for psychosis. <i>The British Journal of Psychiatry</i> , 204(5), 333-334.                                                                                                                                                                                                    | Mindfulness                                                                                          | Psychosis                                        | Clinical intuition                                   | 1 |
| Chand, S. P., & Grossberg, G. T. (2013). How to adapt cognitive-behavioral therapy for older adults. <i>Current psychiatry</i> , 12(3), 10-15.                                                                                                                                                                 | CBT                                                                                                  | Depression<br>Anxiety<br>Schizophrenia           | Clinical intuition<br>Literature review              | 2 |
| Chard, K. M., Schumm, J. A., McIlvain, S. M., Bailey, G. W., & Parkinson, R. B. (2011). Exploring the efficacy of a residential treatment program incorporating cognitive processing therapy-cognitive for veterans with PTSD and traumatic brain injury. <i>Journal of Traumatic Stress</i> , 24(3), 347-351. | Cognitive processing therapy                                                                         | Traumatic brain injury and PTSD                  | Literature review                                    | 1 |
| Chavez-Korell, S., Rendón, A. D., Beer, J.,                                                                                                                                                                                                                                                                    |                                                                                                      |                                                  |                                                      |   |

|                                                                                                                                                                                                                                                                                                            |                                                                  |                                    |                                                                                    |   |
|------------------------------------------------------------------------------------------------------------------------------------------------------------------------------------------------------------------------------------------------------------------------------------------------------------|------------------------------------------------------------------|------------------------------------|------------------------------------------------------------------------------------|---|
| Rodriguez, N., Garr, A. D., Pine, C. A., ... & Malcolm, E. (2012). Improving access and reducing barriers to depression treatment for Latino elders: Un Nuevo Amanecer (A New Dawn). <i>Professional Psychology: Research and Practice</i> , 43(3), 217.                                                   | Behavioral Activation                                            | Depression                         | Literature review<br>Stakeholder interview<br>Theory                               | 3 |
| Cheng, Pei-Han & Merrick, Elizabeth. (2017). Cultural Adaptation of Dialectical Behavior Therapy for a Chinese International Student With Eating Disorder and Depression. <i>Clinical Case Studies</i> .                                                                                                   | DBT                                                              | Eating disorder and depression     | Literature review<br>Theory                                                        | 2 |
| Choi, Isabella & Zou, Judy & Titov, Nickolai & Dear, Blake & Li, Stephen & Johnston, Luke & Andrews, Gavin & Hunt, Caroline. (2011). Culturally attuned Internet treatment for depression amongst Chinese Australians: A randomised controlled trial. <i>Journal of affective disorders</i> . 136. 459-68. | Internet delivered CBT (iCBT)                                    | Depression                         | Literature review                                                                  | 1 |
| Chu, J.P. Huynh, L., & Areán, P. (2012). Cultural adaptation of evidence-based practice utilizing an iterative stakeholder process and theoretical framework: problem solving therapy for Chinese older adults. <i>International Journal of Geriatric Psychiatry</i> , 12(1), 97-106.                      | Problem solving therapy                                          | Depression                         | Clinical Intuition<br>Data<br>Literature Review<br>Stakeholder interview<br>Theory | 5 |
| Churcher Clarke, A., Chan, J. M. Y., Stott, J., Royan, L., & Spector, A. (2017). An adapted mindfulness intervention for people with dementia in care homes: feasibility pilot study. <i>International journal of geriatric psychiatry</i> , 32(12), e123-e131.                                            | Group-based mindfulness program                                  | Depression and anxiety in dementia | Literature review<br>Stakeholder interview<br>Theory                               | 3 |
| Cook, E.A. (2014). Peer Support for Consumers with Psychosis (Doctoral dissertation).                                                                                                                                                                                                                      | CBT for Psychosis (CBTp)<br>Individual resiliency training (IRT) | Psychosis                          | Clinical intuition<br>Stakeholder interview                                        | 2 |
| Cooper, P. J., & Fairburn, C. G. (1984). Cognitive                                                                                                                                                                                                                                                         |                                                                  |                                    |                                                                                    |   |

|                                                                                                                                                                                                                                                                                                                                    |                                                            |                                                                               |                                            |   |
|------------------------------------------------------------------------------------------------------------------------------------------------------------------------------------------------------------------------------------------------------------------------------------------------------------------------------------|------------------------------------------------------------|-------------------------------------------------------------------------------|--------------------------------------------|---|
| behaviour therapy for anorexia nervosa: some preliminary findings. <i>Journal of Psychosomatic Research</i> , 28(6), 493-499.                                                                                                                                                                                                      | Cognitive Behavioral Therapy                               | Anorexia nervosa                                                              | Clinical intuition                         | 1 |
| Courbasson, C. M., & Nishikawa, Y. (2010). Cognitive behavioral group therapy for patients with co-existing social anxiety disorder and substance use disorders: A pilot study. <i>Cognitive Therapy and Research</i> , 34(1), 82-91.                                                                                              | Cognitive behavioral group therapy                         | Social anxiety disorder and substance use disorder                            | Clinical intuition                         | 1 |
| Courbasson, C., Nishikawa, Y., & Dixon, L. (2012). Outcome of dialectical behaviour therapy for concurrent eating and substance use disorders. <i>Clinical Psychology &amp; Psychotherapy</i> , 19(5), 434-449.                                                                                                                    | DBT                                                        | Concurrent eating and substance use disorders                                 | Clinical intuition                         | 1 |
| Dagöö, J., Asplund, R. P., Bsenko, H. A., Hjerling, S., Holmberg, A., Westh, S., ... & Andersson, G. (2014). Cognitive behavior therapy versus interpersonal psychotherapy for social anxiety disorder delivered via smartphone and computer: a randomized controlled trial. <i>Journal of Anxiety Disorders</i> , 28(4), 410-417. | Mobile phone administration CBT                            | Social anxiety disorder                                                       | Literature review<br>Theory                | 2 |
| Daughters, S. B., Magidson, J. F., Schuster, R. M., & Safren, S. A. (2010). ACT HEALTHY: A combined cognitive-behavioral depression and medication adherence treatment for HIV-infected substance users. <i>Cognitive and Behavioral Practice</i> , 17(3), 309-321.                                                                | Combined depression and HIV medication adherence treatment | Comorbid substance use disorders and depression                               | Clinical intuition<br>Literature review    | 2 |
| Davidson, F., Cave, M., Reedman, R., Briffa, D., & Dark, F. (2012). Dialectical behavioral therapy informed treatment with deaf mental health consumers: an Australian pilot program. <i>Australasian Psychiatry</i> , 20(5), 425-428.                                                                                             | DBT                                                        | Depression with borderline personality traits<br>Depression<br>Panic disorder | Literature review<br>Stakeholder interview | 2 |
| Davis, L. W., Lysaker, P. H., Kristeller, J. L.,                                                                                                                                                                                                                                                                                   |                                                            |                                                                               |                                            |   |



|                                                                                                                                                                                                                                                                                                                                                    |                                                                                      |                                                                                                 |                           |   |
|----------------------------------------------------------------------------------------------------------------------------------------------------------------------------------------------------------------------------------------------------------------------------------------------------------------------------------------------------|--------------------------------------------------------------------------------------|-------------------------------------------------------------------------------------------------|---------------------------|---|
| Salyers, M. P., Kovach, A. C., & Woller, S. (2015). Effect of mindfulness on vocational rehabilitation outcomes in stable phase schizophrenia. <i>Psychological Services</i> , 12(3), 303.                                                                                                                                                         | Mindfulness Intervention for Rehabilitation and Recovery in Schizophrenia (MIRRORS). | Schizophrenia                                                                                   | Data Theory               | 2 |
| De Coteau, T., Anderson, J., & Hope, D. (2006). Adapting manualized treatments: Treating anxiety disorders among Native Americans. <i>Cognitive and Behavioral Practice</i> , 13(4), 304-309.                                                                                                                                                      | Cognitive behavioral therapy                                                         | Anxiety disorders                                                                               | Clinical intuition        | 1 |
| De Jong, M., Peeters, F., Gard, T., Ashih, H., Doorley, J., Walker, R., ... & Hoge, E. A. (2018). A randomized controlled pilot study on mindfulness-based cognitive therapy for unipolar depression in patients with chronic pain. <i>The Journal of clinical psychiatry</i> , 79(1).                                                             | Mindfulness-Based Cognitive Therapy                                                  | Active unipolar depression                                                                      | Literature review         | 1 |
| Dimeff, L., Rizvi, S.L., Brown, M., & Linehan, M.M. (2000). Dialectical behavior therapy for substance abuse: a pilot application to methamphetamine-dependent women with borderline personality disorder. <i>Cognitive and Behavioral Practice</i> , 7, 457-468.                                                                                  | DBT                                                                                  | Borderline personality disorder                                                                 | Literature review         | 1 |
| Duchesne, Mônica, Appolinario, José Carlos, Rangé, Bernard Pimentel, Fandiño, Julia, Moya, Tatiana, & Freitas, Silvia R. (2007). The use of a manual-driven group cognitive behavior therapy in a Brazilian sample of obese individuals with binge-eating disorder. <i>Brazilian Journal of Psychiatry</i> , 29(1), 23-25. Epub February 22, 2007. | Group CBT program                                                                    | Binge-eating disorder                                                                           | Clinical intuition Theory | 2 |
| Durrant, C., Clarke, I., Tolland, A., & Wilson, H. (2007). Designing a CBT service for an acute inpatient setting: a pilot evaluation study. <i>Clinical Psychology &amp; Psychotherapy: An International Journal of Theory &amp; Practice</i> , 14(2), 117-125.                                                                                   | CBT                                                                                  | Depression, anxiety and complex trauma, personality disorder, schizophrenia and other psychoses | Theory                    | 1 |

|                                                                                                                                                                                                                                                               |                                     |                                                             |                                         |   |
|---------------------------------------------------------------------------------------------------------------------------------------------------------------------------------------------------------------------------------------------------------------|-------------------------------------|-------------------------------------------------------------|-----------------------------------------|---|
| Dwight-Johnson, M., Aisenberg, E., Golinelli, D., Hong, S., O'Brien, M., & Ludman, E. (2011). Telephone-based cognitive behavioral therapy for Latino patients living in rural areas: a randomized pilot study. <i>Psychiatric Services</i> , 62(8), 936-942. | CBT                                 | Depression                                                  | Clinical intuition<br>Literature review | 2 |
| Dwight-Johnson, M., Aisenberg, E., Golinelli, D., Hong, S., O'Brien, M., & Ludman, E. (2011). Telephone-based cognitive-behavioral therapy for Latino patients living in rural areas: A randomized pilot study. <i>Psychiatric Services</i> , 62(8), 936-942. | CBT                                 | Depression                                                  | Literature review<br>Theory             | 2 |
| Eisendrath, S., Chartier, M., & McLane, M. (2011). Adapting Mindfulness-Based Cognitive Therapy for Treatment-Resistant Depression: A Clinical Case Study. <i>Cognitive and behavioral practice</i> , 18(3), 362–370.                                         | Mindfulness-Based Cognitive Therapy | Major depressive disorder<br>Treatment-resistant depression | Theory                                  | 1 |
| Epstein, E. E., & McCrady, B. S. (1998). Behavioral couples treatment of alcohol and drug use disorders: Current status and innovations. <i>Clinical Psychology Review</i> , 18(6), 689-711.                                                                  | Alcohol Behavioral Couples Therapy  | Alcohol and drug use disorders                              | Literature review<br>Theory             | 2 |
| Erb, S., & Farmer, A. (2013). A condensed dialectical behavior therapy skills group for binge eating disorder: Overcoming winter challenges. <i>Journal of Cognitive Psychotherapy</i> , 27(4), 338.                                                          | DBT                                 | Binge eating disorder                                       | Clinical intuition                      | 1 |
| Esbensen, A. J., & Hartley, S. L. (2013). Cognitive–Behavioral Therapy for Mood Disorders. <i>Psychological therapies for adults with intellectual disabilities</i> , 117-132.                                                                                | CBT                                 | Depression                                                  | Clinical intuition                      | 1 |

Feldman, Jonathan & Matte, Lynne & Interian,

|                                                                                                                                                                                                                                                                                                   |                                                |                                                                                                                                                     |                                   |   |
|---------------------------------------------------------------------------------------------------------------------------------------------------------------------------------------------------------------------------------------------------------------------------------------------------|------------------------------------------------|-----------------------------------------------------------------------------------------------------------------------------------------------------|-----------------------------------|---|
| Alejandro & Lu, Shou-En & Scheckner, Bari & Steinberg, Dara & Oken, Tanya & Kotay, Anu & Sinha, Sumita & Shim, Chang. (2016). Psychological treatment of comorbid asthma and panic disorder in Latino adults: Results from a randomized controlled trial. <i>Behaviour Research and Therapy</i> . | Cognitive behavior psychophysiological therapy | Panic disorder                                                                                                                                      | Data Stakeholder interview Theory | 3 |
| Foote, Brad & Orden, Kimberly. (2016). Adapting Dialectical Behavior Therapy for the Treatment of Dissociative Identity Disorder. <i>American journal of psychotherapy</i> .                                                                                                                      | DBT                                            | Dissociative identity disorder                                                                                                                      | Theory                            | 1 |
| Foote, J., Seligman, M., Magura, S., Handelsman, L., Rosenblum, A., Lovejoy, M., ... & Stimmel, B. (1994). An enhanced positive reinforcement model for the severely impaired cocaine abuser. <i>Journal of Substance Abuse Treatment</i> , 11(6), 525-539.                                       | CBT                                            | Substance use                                                                                                                                       | Clinical intuition                | 1 |
| Forsell, E., Bendix, M., Holländare, F., von Schultz, B. S., Nasiell, J., Blomdahl-Wetterholm, M., ... & Jokinen, J. (2017). Internet delivered cognitive behavior therapy for antenatal depression: A randomised controlled trial. <i>Journal of affective disorders</i> , 221, 56-64.           | CBT                                            | Major depressive disorder                                                                                                                           | Clinical intuition                | 1 |
| Glickman, N. S. (2009). Adapting best practices in CBT for deaf and hearing persons with language and learning challenges. <i>Journal of Psychotherapy Integration</i> , 19(4), 354.                                                                                                              | CBT                                            | Oppositional defiant disorder<br>Attention deficit disorder<br>Intermittent explosive disorder<br>Mild mental retardation<br>Organic brain syndrome | Literature review<br>Theory       | 2 |
| González-Prendes, A. A., Hindo, C., & Pardo, Y. (2011). Cultural values integration in cognitive-behavioral therapy for a Latino with depression. <i>Clinical Case Studies</i> , 10(5), 376-394.                                                                                                  | CBT                                            | Depression                                                                                                                                          | Literature review                 | 1 |

|                                                                                                                                                                                                                                                                                                          |                                               |                                 |                                                    |   |
|----------------------------------------------------------------------------------------------------------------------------------------------------------------------------------------------------------------------------------------------------------------------------------------------------------|-----------------------------------------------|---------------------------------|----------------------------------------------------|---|
| Guo, F., & Hanley, T. (2015). Adapting cognitive behavioral therapy to meet the needs of Chinese clients: Opportunities and challenges. <i>PsyCh Journal</i> , 4(2), 55-65.                                                                                                                              | CBT                                           | Mental illness                  | Literature review<br>Theory                        | 2 |
| Habib, N., Dawood, S., Kingdon, D., & Naeem, F. (2015). Preliminary evaluation of culturally adapted CBT for psychosis (CA-CBTp): findings from developing culturally-sensitive CBT project (DCCP). <i>Behavioural and Cognitive Psychotherapy</i> , 43(2), 200-208.                                     | CBT                                           | Psychosis                       | Data<br>Literature review<br>Stakeholder interview | 3 |
| Haddock, G., Lobban, F., Hatton, C., & Carson, R. (2004). Cognitive-behaviour therapy for people with psychosis and mild intellectual disabilities: A case series. <i>Clinical Psychology &amp; Psychotherapy: An International Journal of Theory &amp; Practice</i> , 11(4), 282-298.                   | CBT                                           | Schizophrenia                   | Clinical intuition<br>Literature review            | 2 |
| Hatch, M. L., Friedman, S., & Paradis, C. M. (1996). Behavioral treatment of obsessive-compulsive disorder in African Americans. <i>Cognitive and Behavioral Practice</i> , 3(2), 303-315.                                                                                                               | Exposure Response Prevention                  | OCD                             | Clinical intuition<br>Literature review            | 2 |
| Hewage, K., Steel, Z., Mohsin, M., Tay, A. K., De Oliveira, J. C., Da Piedade, M., ... & Silove, D. (2018). A wait-list controlled study of a trauma-focused cognitive behavioral treatment for intermittent explosive disorder in Timor-Leste. <i>American Journal of Orthopsychiatry</i> , 88(3), 282. | Trauma-Focused Cognitive Behavioral Treatment | Intermittent explosive disorder | Clinical intuition<br>Theory                       | 2 |
| Hijazi, A. M., Lumley, M. A., Ziadni, M. S., Haddad, L., Rapport, L. J., & Arnetz, B. B. (2014). Brief narrative exposure therapy for posttraumatic stress in Iraqi refugees: A preliminary randomized clinical trial. <i>Journal of traumatic stress</i> , 27(3), 314-322.                              | Brief narrative exposure therapy              | Posttraumatic stress            | Clinical Intuition                                 | 1 |
| Hill, D. M., Craighead, L. W., & Safer, D. L.                                                                                                                                                                                                                                                            |                                               |                                 |                                                    |   |

|                                                                                                                                                                                                                                                                        |                        |                      |                                                                  |   |
|------------------------------------------------------------------------------------------------------------------------------------------------------------------------------------------------------------------------------------------------------------------------|------------------------|----------------------|------------------------------------------------------------------|---|
| (2011). Appetite-focused dialectical behavior therapy for the treatment of binge eating with purging: A preliminary trial. <i>International Journal of Eating Disorders</i> , 44(3), 249-261.                                                                          | DBT                    | Bulimia nervosa      | Clinical intuition<br>Literature review<br>Theory                | 3 |
| Hinton, D. E., & La Roche, M. (2013). Culturally appropriate CBT for the anxiety disorders. <i>CBT for anxiety disorders: a practitioner book</i> , 191-224.                                                                                                           | CBT                    | Anxiety              | Clinical intuition                                               | 1 |
| Hinton, D. E., & Patel, A. (2017). Cultural adaptations of cognitive behavioral therapy. <i>Psychiatric Clinics</i> , 40(4), 701-714.                                                                                                                                  | CBT                    | Trauma               | Clinical intuition                                               | 1 |
| Hinton, D. E., Pich, V., Hofmann, S. G., & Otto, M. W. (2013). Acceptance and Mindfulness Techniques as Applied to Refugee and Ethnic Minority Populations With PTSD: Examples From" Culturally Adapted CBT". <i>Cognitive and Behavioral Practice</i> , 20(1), 33-46. | Culturally Adapted CBT | PTSD                 | Literature review<br>Theory                                      | 2 |
| Hinton, D. E., Rivera, E. I., Hofmann, S. G., Barlow, D. H., & Otto, M. W. (2012). Adapting CBT for traumatized refugees and ethnic minority patients: Examples from culturally adapted CBT (CA-CBT). <i>Transcultural psychiatry</i> , 49(2), 340-365.                | CBT                    | PTSD                 | Clinical intuition                                               | 1 |
| Hodge, D. R. (2011). Alcohol treatment and cognitive-behavioral therapy: Enhancing effectiveness by incorporating spirituality and religion. <i>Social Work</i> , 56(1), 21-31.                                                                                        | CBT                    | Alcoholism           | Clinical intuition<br>Literature review<br>Stakeholder interview | 3 |
| Hodge, D. R., & Lietz, C. A. (2014). Using spiritually modified cognitive-behavioral therapy in substance dependence treatment: Therapists' and clients' perceptions of the presumed benefits and limitations. <i>Health &amp; Social Work</i> , 39(4), 200-210.       | CBT                    | Substance dependence | Stakeholder interview                                            | 1 |

|                                                                                                                                                                                                                                                                                       |                        |                                      |                                                      |   |
|---------------------------------------------------------------------------------------------------------------------------------------------------------------------------------------------------------------------------------------------------------------------------------------|------------------------|--------------------------------------|------------------------------------------------------|---|
| Husain, M. O., Chaudhry, I. B., Mehmood, N., ur Rehman, R., Kazmi, A., Hamirani, M., ... & Naeem, F. (2017). Pilot randomised controlled trial of culturally adapted cognitive behavior therapy for psychosis (CaCBTp) in Pakistan. <i>BMC Health Services Research</i> , 17(1), 808. | CBT                    | Psychosis                            | Literature review<br>Theory                          | 2 |
| Hwang, W. C., Myers, H. F., Chiu, E., Mak, E., Butner, J. E., Fujimoto, K., ... & Miranda, J. (2015). Culturally adapted cognitive-behavioral therapy for Chinese Americans with depression: A randomized controlled trial. <i>Psychiatric Services</i> , 66(10), 1035-1042.          | Culturally adapted CBT | Depression                           | Literature review<br>Stakeholder interview<br>Theory | 3 |
| Interian, A., & Díaz-Martínez, A. M. (2007). Considerations for culturally competent cognitive-behavioral therapy for depression with Hispanic patients. <i>Cognitive and Behavioral Practice</i> , 14(1), 84-97.                                                                     | CBT                    | Depression                           | Clinical intuition<br>Literature review              | 2 |
| Interian, A., Allen, L. A., Gara, M. A., & Escobar, J. I. (2008). A pilot study of culturally adapted cognitive behavior therapy for Hispanics with major depression. <i>Cognitive and Behavioral Practice</i> , 15(1), 67-75.                                                        | CBT                    | Major depression                     | Clinical intuition<br>Literature review              | 2 |
| Jalal, B., Samir, S. W., & Hinton, D. E. (2017). Adaptation of CBT for traumatized Egyptians: Examples from culturally adapted CBT (CA-CBT). <i>Cognitive and behavioral practice</i> , 24(1), 58-71.                                                                                 | Culturally adapted CBT | Trauma-related disorder (e.g., PTSD) | Clinical intuition<br>Literature review              | 2 |
| Jalal, Baland & Kruger, Quessa & Hinton, Devon. (2017). Adaptation of CBT for Traumatized South African Indigenous Groups: Examples from Multiplex CBT for PTSD. <i>Cognitive and Behavioral Practice</i> .                                                                           | Multiplex CBT          | PTSD and trauma-related disorders    | Clinical intuition<br>Literature review<br>Theory    | 3 |

|                                                                                                                                                                                                                                                                                           |                                                               |                                               |                                                                            |   |
|-------------------------------------------------------------------------------------------------------------------------------------------------------------------------------------------------------------------------------------------------------------------------------------------|---------------------------------------------------------------|-----------------------------------------------|----------------------------------------------------------------------------|---|
| Kanter, J. W., Diéguez Hurtado, G., Rusch, L. C., Busch, A. M., & Santiago-Rivera, A. (2008). Behavioral activation for Latinos with depression. <i>Clinical Case Studies</i> , 7(6), 491-506.                                                                                            | Behavioral Activation                                         | Depression                                    | Clinical intuition<br>Literature review                                    | 2 |
| Kaur, M., Murphy, D., & Smith, K. V. (2016). An adapted imaginal exposure approach to traditional methods used within trauma-focused cognitive behavioural therapy, trialled with a veteran population. <i>The Cognitive Behaviour Therapist</i> , 9.                                     | Imaginal reliving and prolonged exposure (Trauma-Focused CBT) | Post-traumatic stress disorder (PTSD)         | Literature review<br>Theory                                                | 2 |
| Klein, A. S., Skinner, J. B., & Hawley, K. M. (2013). Targeting binge eating through components of dialectical behavior therapy: Preliminary outcomes for individually supported diary card self-monitoring versus group-based DBT. <i>Psychotherapy</i> , 50(4), 543.                    | DBT                                                           | Binge eating disorder<br>Bulimia nervosa      | Literature review                                                          | 1 |
| Kneebone, I. I. (2016). A framework to support cognitive behavior therapy for emotional disorder after stroke. <i>Cognitive and Behavioral Practice</i> , 23(1), 99-109.                                                                                                                  | CBT                                                           | Depression<br>Posttraumatic stress<br>Anxiety | Clinical intuition                                                         | 1 |
| Kohn, Laura & Oden, Tatia & Muñoz, Francisco & Robinson, Ayinka & Leavitt, Daria. (2002). Brief Report: Adapted Cognitive Behavioral Group Therapy for Depressed Low-Income African American Women. <i>Community mental health journal</i> .                                              | CBT                                                           | Depression                                    | Clinical intuition<br>Literature Review<br>Stakeholder interview<br>Theory | 4 |
| Kootker, J. A., Fasotti, L., Rasquin, S. M., van Heugten, C. M., & Geurts, A. C. (2012). The effectiveness of an augmented cognitive behavioural intervention for post-stroke depression with or without anxiety (PSDA): the Restore4Stroke-PSDA trial. <i>BMC neurology</i> , 12(1), 51. | CBT                                                           | Depression                                    | Clinical intuition                                                         | 1 |
| LaCount, P.A., Hartung, C.M., Shelton, C.R.,                                                                                                                                                                                                                                              |                                                               |                                               |                                                                            |   |

|                                                                                                                                                                                                                                                                                      |                                             |                                                  |                                                    |   |
|--------------------------------------------------------------------------------------------------------------------------------------------------------------------------------------------------------------------------------------------------------------------------------------|---------------------------------------------|--------------------------------------------------|----------------------------------------------------|---|
| Clapp, J.D., & Clapp, T.K.W. (2015). Preliminary evaluation of a combined group and individual treatment for college students with attention-deficit/hyperactivity disorder. <i>Cognitive and Behavioral Practice</i> , 22, 152-160.                                                 | CBT                                         | ADHD                                             | Clinical intuition<br>Literature review            | 2 |
| Lehavot, K., Litz, B., Millard, S. P., Hamilton, A. B., Sadler, A., & Simpson, T. (2017). Study adaptation, design, and methods of a web-based PTSD intervention for women Veterans. <i>Contemporary clinical trials</i> , 53, 68-79.                                                | Web-based cognitive-behavioral intervention | PTSD                                             | Data<br>Literature review<br>Stakeholder interview | 3 |
| Li, W., Zhang, L., Luo, X., Liu, B., Liu, Z., Lin, F., ... & Kingdon, D. (2017). A qualitative study to explore views of patients', carers' and mental health professionals' to inform cultural adaptation of CBT for psychosis (CBTp) in China. <i>BMC psychiatry</i> , 17(1), 131. | CBT for psychosis                           | Psychosis                                        | Stakeholder interview                              | 1 |
| Lindsay, W.R., Howells, L., & Pitcaithly, D. (1993). Cognitive therapy for depression with individuals with intellectual disabilities. <i>British Journal of Medical Psychology</i> , 66, 135-141.                                                                                   | CBT                                         | Depression                                       | Clinical intuition<br>Literature review,           | 2 |
| Long, M. E., Hammons, M. E., Davis, J. L., Frueh, B. C., Khan, M. M., Elhai, J. D., & Teng, E. J. (2011). Imagery rescripting and exposure group treatment of posttraumatic nightmares in Veterans with PTSD. <i>Journal of Anxiety Disorders</i> , 25(4), 531-535.                  | Imagery Rescripting and Exposure Therapy    | PTSD and chronic posttraumatic nightmares        | Literature review<br>Theory                        | 2 |
| Lynch, T. R. (2000). Treatment of elderly depression with personality disorder comorbidity using dialectical behavior therapy. <i>Cognitive and Behavioral Practice</i> , 7(4), 468-477.                                                                                             | DBT                                         | Depression with personality disorder comorbidity | Theory                                             | 1 |
| Lynch, Thomas & Cheavens, Jennifer. (2008).                                                                                                                                                                                                                                          |                                             |                                                  |                                                    |   |



|                                                                                                                                                                                                                                                                                          |                                                          |                                                                                                                      |                                                   |   |
|------------------------------------------------------------------------------------------------------------------------------------------------------------------------------------------------------------------------------------------------------------------------------------------|----------------------------------------------------------|----------------------------------------------------------------------------------------------------------------------|---------------------------------------------------|---|
| Dialectical behavior therapy for comorbid personality disorders. Journal of clinical psychology.                                                                                                                                                                                         | DBT                                                      | Paranoid personality disorder and obsessive-compulsive personality disorder                                          | Data Theory                                       | 2 |
| Maercker, A., Zöllner, T., Menning, H., Rabe, S., & Karl, A. (2006). Dresden PTSD treatment study: randomized controlled trial of motor vehicle accident survivors. BMC Psychiatry, 6(26).                                                                                               | CBT                                                      | PTSD                                                                                                                 | Literature review                                 | 1 |
| Mancebo, M.C., Steketee, G., Muroff, J., Rasmussen, S., & Zlotnick, C. (2017). Behavioral therapy teams for adults with OCD in a community mental health center: an open trial. Journal of Obsessive-Compulsive and Related Disorders, 13, 18-23.                                        | Exposure and Ritual Prevention                           | OCD                                                                                                                  | Clinical intuition<br>Literature review           | 2 |
| Marchand, L., Marchand, A., Landry, P., Letarte, A., & Labrecque, J. (2013). Efficacy of two cognitive-behavioral treatment modalities for panic disorder with nocturnal panic attacks. Behavior modification, 37(5), 680-704.                                                           | CBT for panic disorder<br>CBT adapted to nocturnal panic | Panic disorder with nocturnal panic                                                                                  | Clinical intuition<br>Literature review           | 2 |
| Markowitz, S. M., Carper, M. M., Gonzalez, J. S., Delahanty, L. M., & Safren, S. A. (2012). Cognitive-behavioral therapy for the treatment of depression and adherence in patients with type 1 diabetes: pilot data and feasibility. The Primary Care Companion to CNS Disorders, 14(2). | CBT for adherence and depression                         | Depression                                                                                                           | Literature review                                 | 1 |
| Mccann, Robin & Ball, Elissa & Ivanoff, Andre. (2000). DBT with an inpatient forensic population: The CMHIP forensic model. Cognitive and Behavioral Practice. 7. 447-456.                                                                                                               | DBT                                                      | Borderline personality disorder, antisocial personality disorder, and concomitant Axis I psychotic or mood disorders | Clinical intuition<br>Literature review<br>Theory | 3 |
| McCullagh, J. & Gray, J.S. (2018). Cognitive                                                                                                                                                                                                                                             |                                                          |                                                                                                                      |                                                   |   |

|                                                                                                                                                                                                                                                                                                                                                      |                       |                                                               |                                             |   |
|------------------------------------------------------------------------------------------------------------------------------------------------------------------------------------------------------------------------------------------------------------------------------------------------------------------------------------------------------|-----------------------|---------------------------------------------------------------|---------------------------------------------|---|
| behavioral models, measures, and treatments for anxiety disorders in American Indians and Alaska natives. In E.C. Chang, C.A. Downey, J.K. Hirsch, & E.A. Yu (Eds.), <i>Treating depression, anxiety, and stress in ethnic and racial groups: Cognitive behavioral approaches</i> (pp. 203-225). Washington, DC: American Psychological Association. | CBT                   | Anxiety disorders                                             | Literature review                           | 1 |
| McGovern, M. P., Lambert-Harris, C., Acquilano, S., Xie, H., Alterman, A. I., & Weiss, R. D. (2009). A cognitive behavioral therapy for co-occurring substance use and posttraumatic stress disorders. <i>Addictive Behaviors</i> , 34(10), 892-897.                                                                                                 | CBT                   | Co-occurring substance use and posttraumatic stress disorders | Clinical intuition<br>Literature review     | 2 |
| McSherry, P., O'Connor, C., Hevey, D., & Gibbons, P. (2012). Service user experience of adapted dialectical behaviour therapy in a community adult mental health setting. <i>Journal of Mental Health</i> , 21(6), 539-547.                                                                                                                          | DBT                   | Borderline personality disorder (BPD)                         | Stakeholder interview                       | 1 |
| Mir, G., Meer, S., Cottrell, D., McMillan, D., House, A., & Kanter, J. W. (2015). Adapted behavioural activation for the treatment of depression in Muslims. <i>Journal of affective disorders</i> , 180, 190-199.                                                                                                                                   | Behavioral Activation | Depression                                                    | Literature review<br>Stakeholder interview  | 2 |
| Muroff, J. (2011). Thinking outside the box: Novel delivery methods for treating hoarding. <i>International Journal of Cognitive Therapy</i> , 4(3), 280-296.                                                                                                                                                                                        | CBT                   | Hoarding disorder                                             | Theory                                      | 1 |
| Naeem, F., Phiri, P., Munshi, T., Rathod, S., Ayub, M., Gobbi, M., & Kingdon, D. (2015). Using cognitive behaviour therapy with South Asian Muslims: findings from the culturally sensitive CBT project. <i>International Review of Psychiatry</i> , 27(3), 233-246.                                                                                 | CBT                   | Depression and psychosis                                      | Clinical intuition<br>Stakeholder interview | 2 |

|                                                                                                                                                                                                                                                                                                                             |                    |                                                            |                                                      |   |
|-----------------------------------------------------------------------------------------------------------------------------------------------------------------------------------------------------------------------------------------------------------------------------------------------------------------------------|--------------------|------------------------------------------------------------|------------------------------------------------------|---|
| Nguyen, S., McKay, A., Wong, D., Rajaratnam, S. M., Spitz, G., Williams, G., ... & Ponsford, J. L. (2017). Cognitive behavior therapy to treat sleep disturbance and fatigue after traumatic brain injury: a pilot randomized controlled trial. <i>Archives of physical medicine and rehabilitation</i> , 98(8), 1508-1517. | CBT                | Sleep disturbance and fatigue After traumatic brain injury | Literature review                                    | 1 |
| O'Mahen, H., Himle, J. A., Fedock, G., Henshaw, E., & Flynn, H. (2013). A pilot randomized controlled trial of cognitive behavioral therapy for perinatal depression adapted for women with low incomes. <i>Depression and anxiety</i> , 30(7), 679-687.                                                                    | CBT                | Major depressive disorder (MDD)                            | Clinical intuition<br>Data<br>Stakeholder interview  | 3 |
| O'Hearn, Amanda & Pollard Jr, Robert. (2008). Modifying Dialectical Behavior Therapy for Deaf Individuals. <i>Cognitive and Behavioral Practice</i> . 15. 400-414.                                                                                                                                                          | DBT                | Borderline personality disorder                            | Clinical intuition<br>Theory                         | 2 |
| Oakes, J., Gardiner, P., McLaughlin, K., & Battersby, M. (2012). A pilot group cognitive behavioural therapy program for problem gamblers in a rural Australian setting. <i>International Journal of Mental Health and Addiction</i> , 10(4), 490-500.                                                                      | CBT                | Gambling disorder                                          | Theory                                               | 1 |
| Otto, M. W., & Hinton, D. E. (2006). Modifying exposure-based CBT for Cambodian refugees with posttraumatic stress disorder. <i>Cognitive and Behavioral Practice</i> , 13(4), 261-270.                                                                                                                                     | Exposure-based CBT | PTSD                                                       | Literature Review<br>Theory                          | 2 |
| Pachankis, J. E. (2014). Uncovering clinical principles and techniques to address minority stress, mental health, and related health risks among gay and bisexual men. <i>Clinical Psychology: Science and Practice</i> , 21(4), 313-330.                                                                                   | CBT                | Minority stress<br>Mental health<br>Related health risks   | Literature review<br>Stakeholder interview<br>Theory | 3 |
| Pachankis, J. E., Hatzenbuehler, M. L., Rendina,                                                                                                                                                                                                                                                                            |                    |                                                            |                                                      |   |

|                                                                                                                                                                                                                                                                                                          |                                           |                                                    |                                                       |   |
|----------------------------------------------------------------------------------------------------------------------------------------------------------------------------------------------------------------------------------------------------------------------------------------------------------|-------------------------------------------|----------------------------------------------------|-------------------------------------------------------|---|
| H. J., Safren, S. A., & Parsons, J. T. (2015). LGB-affirmative cognitive-behavioral therapy for young adult gay and bisexual men: A randomized controlled trial of a transdiagnostic minority stress approach. <i>Journal of consulting and clinical psychology</i> , 83(5), 875.                        | CBT                                       | Depression, anxiety, and co-occurring health risks | Clinical intuition<br>Stakeholder interview           | 2 |
| Pan, D., Huey Jr, S. J., & Hernandez, D. (2011). Culturally adapted versus standard exposure treatment for phobic Asian Americans: Treatment efficacy, moderators, and predictors. <i>Cultural Diversity and Ethnic Minority Psychology</i> , 17(1), 11.                                                 | Exposure Treatment, one-session treatment | Specific phobia                                    | Data<br>Literature review<br>Theory                   | 3 |
| Papas, R. K., Sidle, J. E., Martino, S., Baliddawa, J. B., Songole, R., Omolo, O. E., ... & Owino-Ong'or, W. D. (2010). Systematic cultural adaptation of cognitive-behavioral therapy to reduce alcohol use among HIV-infected outpatients in western Kenya. <i>AIDS and Behavior</i> , 14(3), 669-678. | CBT                                       | Alcohol use                                        | Clinical intuition<br>Stakeholder interview<br>Theory | 3 |
| Parrish, B. D. (2008). Dialectical behavior therapy deployed: An aggressive alternative to traditional mental health on the noncontiguous battlefield. <i>US Army Medical Department Journal</i> , 24-32.                                                                                                | DBT                                       | Mental illness                                     | Clinical intuition                                    | 1 |
| Patel, S. R., Carmody, J., & Simpson, H. B. (2007). Adapting mindfulness-based stress reduction for the treatment of obsessive-compulsive disorder: A case report. <i>Cognitive and Behavioral Practice</i> , 14(4), 375-380.                                                                            | Mindfulness-Based Stress Reduction        | OCD                                                | Literature review                                     | 1 |
| Patel, S. R., Wheaton, M. G., Andersson, E., Rück,                                                                                                                                                                                                                                                       |                                           |                                                    |                                                       |   |

|                                                                                                                                                                                                                                                                                                     |                                                              |                                                        |                                            |   |
|-----------------------------------------------------------------------------------------------------------------------------------------------------------------------------------------------------------------------------------------------------------------------------------------------------|--------------------------------------------------------------|--------------------------------------------------------|--------------------------------------------|---|
| C., Schmidt, A. B., La Lima, C. N., ... & Simpson, H. B. (2018). Acceptability, feasibility, and effectiveness of internet-based cognitive-behavioral therapy for obsessive-compulsive disorder in new york. <i>Behavior therapy</i> , 49(4), 631-641.                                              | Internet CBT, consisting of exposure and response prevention | Obsessive-compulsive disorder                          | Literature review<br>Stakeholder interview | 2 |
| Paterson, L. Q., Handy, A. B., & Brotto, L. A. (2017). A pilot study of eight-session mindfulness-based cognitive therapy adapted for women's sexual interest/arousal disorder. <i>The Journal of Sex Research</i> , 54(7), 850-861.                                                                | Mindfulness-based cognitive therapy                          | Women's sexual interest/arousal disorder               | Data<br>Literature review                  | 2 |
| Pearce, M. J., Koenig, H. G., Robins, C. J., Nelson, B., Shaw, S. F., Cohen, H. J., & King, M. B. (2015). Religiously integrated cognitive behavioral therapy: A new method of treatment for major depression in patients with chronic medical illness. <i>Psychotherapy</i> , 52(1), 56.           | Religiously-Integrated CBT                                   | Major depression                                       | Literature review<br>Theory                | 2 |
| Penberthy, J. K., Gioia, C. J., Konig, A., Martin, A. M., Cockrell, S. A., & Meshberg-Cohen, S. (2014). Co-occurring chronic depression and alcohol dependence: A novel treatment approach. <i>Addictive Disorders &amp; Their Treatment</i> , 13(2), 54-67.                                        | Cognitive Behavioral Analysis System of Psychotherapy        | Co-occurring alcohol dependence and chronic depression | Literature review                          | 1 |
| Pence, S. L., Aldea, M. A., Sulkowski, M. L., & Storch, E. A. (2011). Cognitive behavioral therapy in adults with obsessive-compulsive disorder and borderline intellectual functioning: A case series of three patients. <i>Journal of Developmental and Physical Disabilities</i> , 23(2), 71-85. | CBT                                                          | OCD                                                    | Literature review<br>Theory                | 2 |
| Puente, A. N., & Mitchell, J. T. (2016). Cognitive-                                                                                                                                                                                                                                                 |                                                              |                                                        |                                            |   |

|                                                                                                                                                                                                                                                                     |                                     |                          |                                                                  |   |
|---------------------------------------------------------------------------------------------------------------------------------------------------------------------------------------------------------------------------------------------------------------------|-------------------------------------|--------------------------|------------------------------------------------------------------|---|
| behavioral therapy for adult ADHD: A case study of multi-method assessment of executive functioning in clinical practice and manualized treatment adaptation. <i>Clinical Case Studies</i> , 15(3), 198-211.                                                        | CBT                                 | ADHD                     | Clinical intuition<br>Literature review                          | 2 |
| Pugliese, C. E., & White, S. W. (2014). Brief report: Problem solving therapy in college students with autism spectrum disorders: Feasibility and preliminary efficacy. <i>Journal of autism and developmental disorders</i> , 44(3), 719-729.                      | Group-based problem solving therapy | Autism spectrum disorder | Literature review                                                | 1 |
| Ramos, Z. & Alegría, M. (2014). Cultural adaptation and health literacy refinement of a brief depression intervention for latinos in a low-resource setting. <i>Cultural Diversity and Ethnic Minority Psychology</i> , 20(2), 293-301.                             | CBT                                 | Depression               | Clinical intuition<br>Literature review<br>Stakeholder interview | 3 |
| Randall, E.J. (1994). Cultural relativism in cognitive therapy with disadvantaged African American women. <i>Journal of Cognitive Psychotherapy: An International Quarterly</i> , 8(3), 195-206.                                                                    | Cognitive therapy                   | Depression               | Clinical intuition<br>Theory                                     | 2 |
| Reback, C. J., Veniegas, R., & Shoptaw, S. (2014). Getting off: development of a model program for gay and bisexual male methamphetamine users. <i>Journal of homosexuality</i> , 61(4), 540-553.                                                                   | CBT                                 | Substance use disorder   | Clinical intuition<br>Stakeholder interview                      | 2 |
| Rosen, D. D., Rebeta, J. L., & Rothschild, S. Z. (2014). Culturally competent adaptation of cognitive-behavioural therapy for psychosis: cases of Orthodox Jewish patients with messianic delusions. <i>Mental Health, Religion &amp; Culture</i> , 17(7), 703-713. | CBT                                 | Psychosis                | Data<br>Literature review<br>Theory                              | 2 |
| Sayegh, L., Locke, K. D., Pistilli, D., Penberthy, J.                                                                                                                                                                                                               |                                     |                          |                                                                  |   |

|                                                                                                                                                                                                                                                                                                                    |                                                        |                                            |                                         |   |
|--------------------------------------------------------------------------------------------------------------------------------------------------------------------------------------------------------------------------------------------------------------------------------------------------------------------|--------------------------------------------------------|--------------------------------------------|-----------------------------------------|---|
| K., Chachamovich, E., McCullough, J. P., & Turecki, G. (2012). Cognitive behavioural analysis system of psychotherapy for treatment-resistant depression: Adaptation to a group modality. <i>Behaviour Change</i> , 29(2), 97-108.                                                                                 | Cognitive Behavioural Analysis System of Psychotherapy | Treatment-resistant depression             | Literature review<br>Theory             | 2 |
| Schulz, P. M., Huber, L. C., & Resick, P. A. (2006). Practical adaptations of cognitive processing therapy with Bosnian refugees: Implications for adapting practice to a multicultural clientele. <i>Cognitive and Behavioral Practice</i> , 13(4), 310-321.                                                      | Cognitive Processing Therapy                           | PTSD                                       | Clinical intuition<br>Literature review | 2 |
| Shea, M., Cachelin, F., Uribe, L., Striegel, R. H., Thompson, D., & Wilson, G. T. (2012). Cultural adaptation of a cognitive behavior therapy guided self-help program for Mexican American women with binge eating disorders. <i>Journal of Counseling and Development</i> , 90(3), 308-318.                      | CBT                                                    | Binge eating disorder                      | Stakeholder interview                   | 1 |
| Spoont, M. R., Sayer, N. A., Thuras, P., Erbes, C., & Winston, E. (2003). Practical psychotherapy: Adaptation of dialectical behavior therapy by a VA Medical Center. <i>Psychiatric Services</i> , 54(5), 627-629.                                                                                                | DBT                                                    | PTSD and other psychiatric symptoms        | Clinical intuition                      | 1 |
| Stenfert Kroese, B., Willott, S., Taylor, F., Smith, P., Graham, R., Rutter, T., ... & Willner, P. (2016). Trauma-focussed cognitive-behaviour therapy for people with mild intellectual disabilities: Outcomes of a pilot study. <i>Advances in Mental Health and Intellectual Disabilities</i> , 10(5), 299-310. | Trauma-focused CBT                                     | Intellectual disabilities and complex PTSD | Literature review<br>Theory             | 2 |
| Surawy, C., McManus, F., Muse, K., & Williams, J. M. G. (2015). Mindfulness-based cognitive therapy (MBCT) for health anxiety (hypochondriasis): rationale, implementation and case illustration. <i>Mindfulness</i> , 6(2), 382-392.                                                                              | Mindfulness-Based Cognitive Therapy                    | Hypochondriasis                            | Clinical intuition                      | 1 |

|                                                                                                                                                                                                                                                                                                                                                                  |                                         |                           |                                                     |   |
|------------------------------------------------------------------------------------------------------------------------------------------------------------------------------------------------------------------------------------------------------------------------------------------------------------------------------------------------------------------|-----------------------------------------|---------------------------|-----------------------------------------------------|---|
| Turner, K. A., Smith, A. J., Jones, R. T., & Harrison, D. W. (2018). Adapting Cognitive Processing Therapy to Treat Co-Occurring Posttraumatic Stress Disorder and Mild Traumatic Brain Injury: A Case Study. <i>Cognitive and Behavioral Practice</i> , 25(2), 261-274.                                                                                         | Cognitive Processing Therapy            | PTSD                      | Theory                                              | 1 |
| Uebelacker, L. A., Weisberg, R. B., Haggarty, R., & Miller, I. W. (2009). Adapted behavior therapy for persistently depressed primary care patients: an open trial. <i>Behavior Modification</i> , 33(3), 374-395.                                                                                                                                               | Behavior therapy                        | Major depressive disorder | Clinical intuition                                  | 1 |
| Valentine, S. E., Borba, C. P., Dixon, L., Vaeworn, A. S., Guajardo, J. G., Resick, P. A., ... & Marques, L. (2017). Cognitive Processing Therapy for Spanish-speaking Latinos: A Formative Study of a Model-Driven Cultural Adaptation of the Manual to Enhance Implementation in a Usual Care Setting. <i>Journal of Clinical Psychology</i> , 73(3), 239-256. | Cognitive Processing Therapy            | PTSD                      | Clinical intuition<br>Data<br>Stakeholder interview | 3 |
| Venner, K. L., Greenfield, B. L., Hagler, K. J., Simmons, J., Lupee, D., Homer, E., ... & Smith, J. E. (2016). Pilot outcome results of culturally adapted evidence-based substance use disorder treatment with a Southwest Tribe. <i>Addictive Behaviors Reports</i> , 3, 21-27.                                                                                | CBT                                     | Substance use disorder    | Theory                                              | 1 |
| Wade, S., Byrne, S., & Allen, K. (2017). Enhanced cognitive behavioral therapy for eating disorders adapted for a group setting. <i>International Journal of Eating Disorders</i> , 50(8), 863-872.                                                                                                                                                              | Enhanced cognitive behavioral treatment | Eating disorders          | Literature review                                   | 1 |
| Wagner, B., Schulz, W., & Knaevelsrud, C. (2012). Efficacy of an Internet-based intervention for posttraumatic stress disorder in Iraq: a pilot study. <i>Psychiatry Research</i> , 195(1-2), 85-88.                                                                                                                                                             | Internet-based CBT                      | PTSD                      | Literature review                                   | 1 |
| Wagner, E. E., Miller, A. L., Greene, L. I., &                                                                                                                                                                                                                                                                                                                   |                                         |                           |                                                     |   |



|                                                                                                                                                                                                                                                   |                        |                                                             |                                                                  |   |
|---------------------------------------------------------------------------------------------------------------------------------------------------------------------------------------------------------------------------------------------------|------------------------|-------------------------------------------------------------|------------------------------------------------------------------|---|
| Winiarski, M. G. (2004). Dialectical behavior therapy for substance abusers adapted for persons living with HIV/AIDS with substance use diagnoses and borderline personality disorder. <i>Cognitive and Behavioral Practice</i> , 11(2), 202-212. | DBT                    | Substance use diagnoses and borderline personality disorder | Clinical intuition<br>Literature review<br>Stakeholder interview | 3 |
| Ward, E. C., & Brown, R. L. (2015). A culturally adapted depression intervention for African American adults experiencing depression: Oh Happy Day. <i>American Journal of Orthopsychiatry</i> , 85(1), 11.                                       | Coping With Depression | Major depressive disorder                                   | Data<br>Literature review<br>Theory                              | 3 |
| Wiser, S., & Telch, C. F. (1999). Dialectical behavior therapy for binge-eating disorder. <i>Journal of clinical psychology</i> , 55(6), 755-768.                                                                                                 | DBT                    | Binge-eating disorder                                       | Literature review<br>Theory                                      | 2 |
| Wolpow, S., Porter, M., & Hermanos, E. (2000). Adapting a dialectical behavior therapy (DBT) group for use in a residential program. <i>Psychiatric Rehabilitation Journal</i> , 24(2), 135.                                                      | DBT                    | Varied psychiatric disorders                                | Clinical intuition                                               | 1 |
| Zhou, E. S., Partridge, A. H., & Recklitis, C. J. (2017). A pilot trial of brief group cognitive-behavioral treatment for insomnia in an adult cancer survivorship program. <i>Psycho-Oncology</i> , 26(6), 843-848.                              | CBT                    | Insomnia                                                    | Clinical intuition                                               | 1 |

---

#### Ad Hoc Adaptations

|                                                                                                                                                                                                                                                                 |             |            |                    |   |
|-----------------------------------------------------------------------------------------------------------------------------------------------------------------------------------------------------------------------------------------------------------------|-------------|------------|--------------------|---|
| Bruijnicks, S. J., Franx, G., & Huibers, M. J. (2018). The implementation and adherence to evidence-based protocols for psychotherapy for depression: the perspective of therapists in Dutch specialized mental healthcare. <i>BMC Psychiatry</i> , 18(1), 190. | CBT and IPT | Depression | Clinical intuition | 1 |
|-----------------------------------------------------------------------------------------------------------------------------------------------------------------------------------------------------------------------------------------------------------------|-------------|------------|--------------------|---|

Cook, J. M., Dinnen, S., Thompson, R., Simiola,

---

|                                                                                                                                                                                                                            |                                                    |        |                    |   |
|----------------------------------------------------------------------------------------------------------------------------------------------------------------------------------------------------------------------------|----------------------------------------------------|--------|--------------------|---|
| V., & Schnurr, P. P. (2014). Changes in implementation of two evidence-based psychotherapies for PTSD in VA residential treatment programs: A national investigation. <i>Journal of Traumatic Stress, 27</i> (2), 137-143. | Prolonged exposure<br>Cognitive processing therapy | PTSD   | Clinical intuition | 1 |
| Cooper, K., Loades, M. E., & Russell, A. (2018). Adapting psychological therapies for autism. <i>Research in Autism Spectrum Disorders, 45</i> , 43-50.                                                                    | CBT                                                | Autism | Clinical intuition | 1 |

---

Note. The classification system used varied across studies, depending on when the study was conducted.
